# Supplementary material
Source: PubMed Central journal article supplement (PMC2878565)
Supplement: supp_M109.083121_jbc.M109.083121-1.pdf [file supp_M109.083121_jbc.M109.083121-1.pdf]

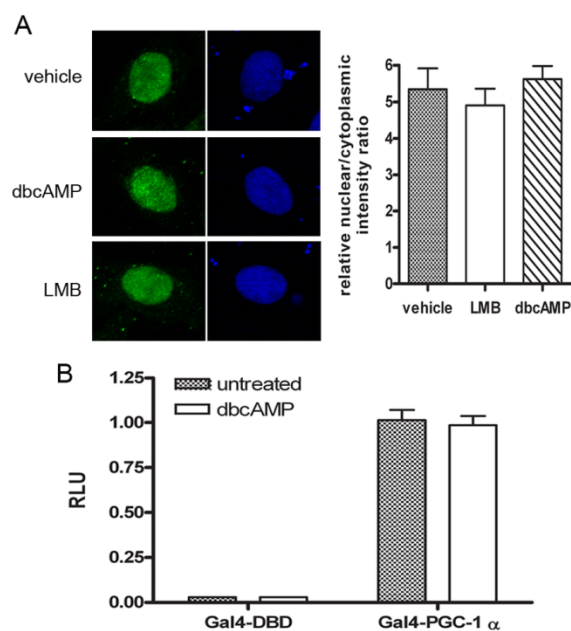

**Fig. S1. The effect of LMB and dbcAMP on localization and transcriptional activity of PGC-1 $\alpha$ .**

(A) Localization of PGC-1 $\alpha$  is not affected by LMB and dbcAMP. CHO-K1 cells were transiently transfected with PGC-1 $\alpha$ -HA and treated with vehicle, LMB, or dbcAMP for 1 h. Bar diagram of the relative ratios of nuclear to cytoplasmic fluorescence intensity of NT-PGC-1 $\alpha$  is shown with the mean value and standard error. (B) Transcriptional coactivation assay. Gal4-DBD and Gal4-PGC-1 $\alpha$  were cotransfected in CHO-K1 cells with a luciferase reporter containing Gal4 DNA binding sites and a renilla luciferase reporter. 24 h after transfection cells were treated with vehicle or dbcAMP. Luciferase activity was determined 48 h after transfection.

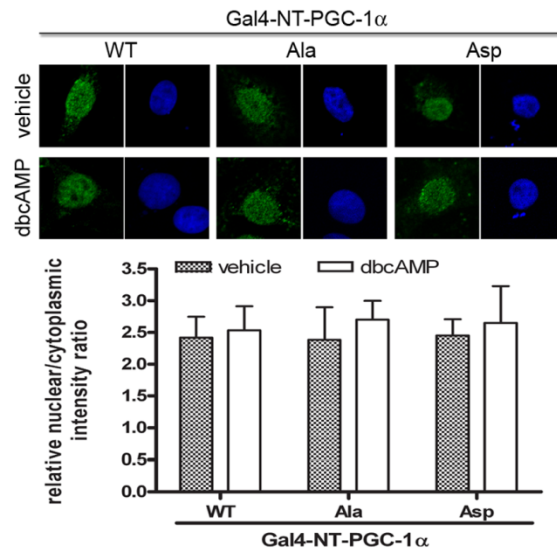

**Fig. S2. Gal4-DBD fusion drives wild type and mutant NT-PGC-1 $\alpha$  to the nucleus.**

CHO-K1 cells were transfected with Gal4-NT-PGC-1 $\alpha$ , Gal4-NT-PGC-1 $\alpha$ -S194A, S241A, T256A, and Gal4-NT-PGC-1 $\alpha$ -S194D, S241D, T256D and treated with vehicle or dbcAMP. Bar diagram of the relative ratios of nuclear to cytoplasmic fluorescence intensity of NT-PGC-1a is shown with the mean value and standard error.
